# Supplementary material
Source: PubMed Central journal article supplement (PMC2872450)
Supplement: 1000698107_pnas.201000698SI.pdf [file 1000698107_pnas.201000698SI.pdf]

# Supporting Information

Lan et al. 10.1073/pnas.1000698107

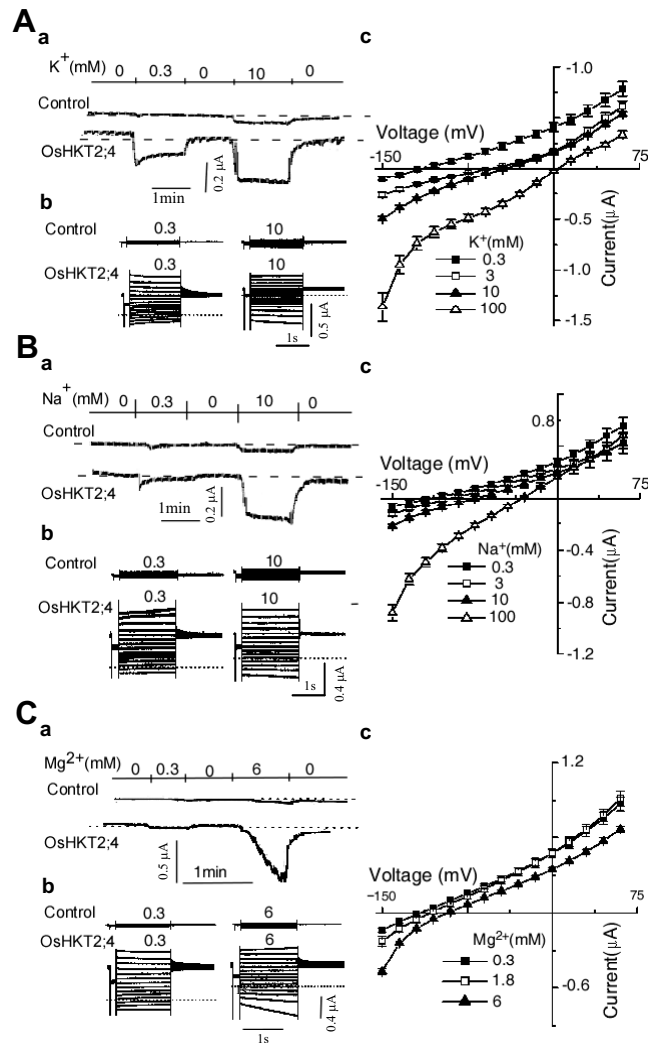

**Fig. S1.** OshKT2;4 currents are sensitive to extracellular  $K^+$  (A),  $Na^+$  (B), and  $Mg^{2+}$  (C). (a) Typical traces recorded at  $-120$  mV from a control oocyte and an oocyte expressing OshKT2;4 perfused with the solution containing 185 mM mannitol, 10 mM Mes-Tris (pH 7.4) with 0, 0.3, or 10 mM  $K^+$  (A),  $Na^+$  (B), or 0, 0.3, or 6 mM  $Mg^{2+}$  (C) as indicated. (b) Typical traces recorded with voltages ranging from 60 to  $-150$  mV (15-mV increments). Oocytes were perfused with a solution containing 185 mM mannitol, 10 mM Mes-Tris (pH 7.4) with 0.3 or 10 mM K-gluconate (or Na-gluconate or MgCl<sub>2</sub>). (c) The current-voltage relationship of control and OshKT2;4 currents. Oocytes were perfused with a solution containing 185 mM mannitol, 10 mM Mes-Tris (pH 7.4) with the indicated concentrations of K-gluconate (or Na-gluconate or MgCl<sub>2</sub>). Summarized current data are from 10 cells/condition.



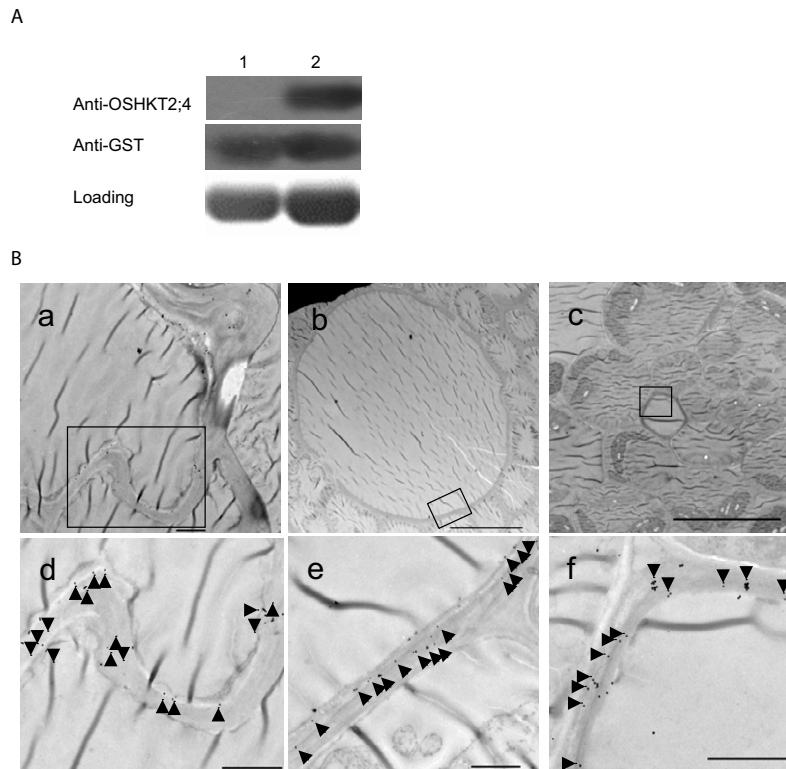

**Fig. S4.** (A) Antibody used in immunogold detection was specific for OshKT2;4. *Escherichia coli*-expressed GST-OshKT2;3 (lane 1) and GST-OshKT2;4 (lane 2) were purified and assayed by Western blot using anti-OshKT2;4 antibody. A GST antibody detected both fusion proteins. Coomassie brilliant blue-stained bands were used to show loading control. (B) Immunogold localization of the OshKT2;4 protein to the plasma membrane of different cells. (a) Leaf epidermal cells. (b) Root vascular cells. (c) Leaf vascular cells. d, e, and f are enlarged sections of a, b, and c, respectively. Arrowheads indicate gold particles. (Scale bars: a, d, e, and f—1  $\mu$ m; b and c—10  $\mu$ m.)
